# Supplementary material for: Low-grade inflammation is negatively associated with physical Health-Related Quality of Life in healthy individuals: Results from The Danish Blood Donor Study (DBDS)
Source: PubMed Central journal article supplement (PMC6438577; doi:10.1371/journal.pone.0214468), 2019-03-28
Supplement: pone.0214468.s001.pdf [file pone.0214468.s001.pdf]

**THE DANISH BLOOD DONOR STUDY**

We will kindly ask you to answer some questions regarding your health and lifestyle. If there are any questions you cannot answer, just skip them.

The questions in the survey can be answered by ticking a box or by writing a number. Please fill the survey with a black or blue pen, as the answers will be read by a machine. Do not use a pencil. Numbers should be easy to interpret, shown in the example below:

0 1 2 3 4 5 6 7 8 9

If you write a wrong number in a field, you should correct it like this: ~~19~~

If you tick in a wrong box you must cross out the wrong box until it is completely filled. Then you can tick the right box.

Please contact the staff if you have any questions about the survey.  
Please return the completed questionnaire to the staff.

**Thank you in advance for your help!**

**The following questions are about your perception of your health**

1. How do you think your health is in general? (Tick one box only)

|                          |                          |                          |                          |                          |
|--------------------------|--------------------------|--------------------------|--------------------------|--------------------------|
| Excellent                | Very good                | Good                     | Fair                     | Poor                     |
| <input type="checkbox"/> | <input type="checkbox"/> | <input type="checkbox"/> | <input type="checkbox"/> | <input type="checkbox"/> |

2. The following questions are about activities of everyday life. Does your health limit you in these activities? If so, how much?

|                                                                                           | Yes, limited<br>a lot    | Yes, limited<br>a little | No, not limited<br>at all |
|-------------------------------------------------------------------------------------------|--------------------------|--------------------------|---------------------------|
| Moderate activities, such as moving a table,<br>pushing a vacuum cleaner or cycling ..... | <input type="checkbox"/> | <input type="checkbox"/> | <input type="checkbox"/>  |
| Climbing several flights of stairs.....                                                   | <input type="checkbox"/> | <input type="checkbox"/> | <input type="checkbox"/>  |

3. During the past 4 weeks have you had any of the following problems with your work or other regular activities as a result of your physical health?

|                                                           | Yes                      | No                       |
|-----------------------------------------------------------|--------------------------|--------------------------|
| Accomplished less than you would like .....               | <input type="checkbox"/> | <input type="checkbox"/> |
| Were limited in the kind of work or other activities..... | <input type="checkbox"/> | <input type="checkbox"/> |

4. During the past 4 weeks, were you limited in the kind of work you do or other regular activities as a result of any emotional problems (such as feeling depressed or anxious)?

|                                                                | Yes                      | No                       |
|----------------------------------------------------------------|--------------------------|--------------------------|
| Accomplished less than you would like .....                    | <input type="checkbox"/> | <input type="checkbox"/> |
| Did not do work or other activities as carefully as usual..... | <input type="checkbox"/> | <input type="checkbox"/> |

5. During the past 4 weeks, how much did pain interfere with your normal work (including both work outside the home and housework)? (Tick one box only)

|                          |                          |                          |                          |                          |
|--------------------------|--------------------------|--------------------------|--------------------------|--------------------------|
| Not at all               | A little bit             | Moderately               | Quite a bit              | Extremely                |
| <input type="checkbox"/> | <input type="checkbox"/> | <input type="checkbox"/> | <input type="checkbox"/> | <input type="checkbox"/> |

6. The next three questions are about how you feel and how things have been during the past 4 weeks. How much of the time during the past 4 weeks...

|                                              | All of the time          | Most of the time         | A good bit of the time   | Some of the time         | A little of the time     | None of the time         |
|----------------------------------------------|--------------------------|--------------------------|--------------------------|--------------------------|--------------------------|--------------------------|
| ... have you felt calm and paeceful?         | <input type="checkbox"/> | <input type="checkbox"/> | <input type="checkbox"/> | <input type="checkbox"/> | <input type="checkbox"/> | <input type="checkbox"/> |
| ... did you have a lot of energy?.....       | <input type="checkbox"/> | <input type="checkbox"/> | <input type="checkbox"/> | <input type="checkbox"/> | <input type="checkbox"/> | <input type="checkbox"/> |
| ... have you felt downhearted and blue?..... | <input type="checkbox"/> | <input type="checkbox"/> | <input type="checkbox"/> | <input type="checkbox"/> | <input type="checkbox"/> | <input type="checkbox"/> |

7. During the past 4 weeks, how much of the time has your physical health or emotional problems interfered with your social activities (like visiting with wriends, relatives, etc.)?

| All of the time          | Most of the time         | Some of the time         | A little of the time     | None of the time         |
|--------------------------|--------------------------|--------------------------|--------------------------|--------------------------|
| <input type="checkbox"/> | <input type="checkbox"/> | <input type="checkbox"/> | <input type="checkbox"/> | <input type="checkbox"/> |

8. How do you consider your health compared to other on your own age?.....

| Better                   | Same                     | Poorer                   |
|--------------------------|--------------------------|--------------------------|
| <input type="checkbox"/> | <input type="checkbox"/> | <input type="checkbox"/> |

**The next question is about general infectious disease**

9. Have you ever been told from a doctor that you have kissing disease (mononucleosis)? .....

| Yes                      | No                       |
|--------------------------|--------------------------|
| <input type="checkbox"/> | <input type="checkbox"/> |

If yes: How old was you then?..... Age:

**The next questions are about vitamin supplements, iron supplements, diet and alcohol**

10. During the past 4 weeks, have you been taking multivitamins?

|                                                     |                          |
|-----------------------------------------------------|--------------------------|
| Yes, everyday.....                                  | <input type="checkbox"/> |
| Yes, 4-6 times per week.....                        | <input type="checkbox"/> |
| Yes, 1-3 times per week .....                       | <input type="checkbox"/> |
| Yes, less than 3 times within the last 4 weeks..... | <input type="checkbox"/> |
| No.....                                             | <input type="checkbox"/> |

11. During the past 4 weeks, have you been taking iron supplements?

|                                                     |                          |
|-----------------------------------------------------|--------------------------|
| Yes, everyday.....                                  | <input type="checkbox"/> |
| Yes, 4-6 times per week.....                        | <input type="checkbox"/> |
| Yes, 1-3 times per week .....                       | <input type="checkbox"/> |
| Yes, less than 3 times within the last 4 weeks..... | <input type="checkbox"/> |
| No.....                                             | <input type="checkbox"/> |

12. Last time you donated blood, did you get any iron supplements?.....

| Yes                      | No                       |
|--------------------------|--------------------------|
| <input type="checkbox"/> | <input type="checkbox"/> |

If yes: How many iron tablets did you take?..... Times:

13. How many times in 1 week do you eat meat? .....

Times:

14. How many times in 1 week do you eat fish?.....

Times:

15. How many eggs do you eat in 1 week? .....

Number:

16. How often do you drink ...

|                | Never /<br>almost<br>never | Few times<br>a month     | Few<br>times a<br>week   | Everyday<br>/ almost<br>everyday | Average number<br><b>per week</b> |
|----------------|----------------------------|--------------------------|--------------------------|----------------------------------|-----------------------------------|
| milk? .....    | <input type="checkbox"/>   | <input type="checkbox"/> | <input type="checkbox"/> | <input type="checkbox"/>         | Glasses: <input type="text"/>     |
| coffee? .....  | <input type="checkbox"/>   | <input type="checkbox"/> | <input type="checkbox"/> | <input type="checkbox"/>         | Cups: <input type="text"/>        |
| tea?.....      | <input type="checkbox"/>   | <input type="checkbox"/> | <input type="checkbox"/> | <input type="checkbox"/>         | Cups: <input type="text"/>        |
| beer?.....     | <input type="checkbox"/>   | <input type="checkbox"/> | <input type="checkbox"/> | <input type="checkbox"/>         | Bottles: <input type="text"/>     |
| wine?.....     | <input type="checkbox"/>   | <input type="checkbox"/> | <input type="checkbox"/> | <input type="checkbox"/>         | Glasses: <input type="text"/>     |
| spirits? ..... | <input type="checkbox"/>   | <input type="checkbox"/> | <input type="checkbox"/> | <input type="checkbox"/>         | Units: <input type="text"/>       |

**The next questions are about smoking**

17. Do you smoke?
- Yes, more than 1 cigarette / cerut / pipe per day.....  **Go to question 20**
- Yes, but less than 1 cigarette / cerut / pipe per day.....  **Go to question 20**
- No .....

18. Have you smoked before?
- Yes, more than 1 cigarette / cheroot / pipe per day.....
- Yes, but less than 1 cigarette / cheroot / pipe per day.....
- No .....  **Go to question 23**

19. When did you stop smoking? ..... Year:

20. How many years did you smoke regularly? ..... Number of whole years:

21. How much do you smoke (or did) during 1 day in average?

Number of cigarettes.....

Number of cheroots or cigars.....

Number of pipes.....

22. Do you use nicotine replacement (gum, plaster or similar)? .....  Yes  No

**If yes:** How long time have you used it?..... Number of whole years:

23. How many hours per day are you exposed for passive smoking? ..... Hours:

24. Was there smoking in your childhood home?.....  Yes  No

**Only for women – men please go to question 30**

25. How old was you, when you got your period?..... Age:

26. Are you in menopause?.....  Yes  No

**If no:** How many days do your period last? Number of days:

**If yes:** Did it stop because of medication or other treatment?..... Yes  No

How old was you, when your period stopped?..... Age:

27. Have you given birth? ..... Yes  No

28. Have you given breast-feed?..... Yes  No

**If yes:** In total, how long how you been breast-feeding?..... Number of months

29. Do you use birth control? ..... Yes  No

**If yes:** mark the type of birth control you use now:

P-piller .....

Mini-piller .....

Almindelig spiral ...

Hormonspiral .....

P-stav .....

P-ring eller p-plaster

Anden prævention

**The next questions are about exercise, weight and height**

30. How would you describe your work or daily occupation? (tick one box only)  
 ☞ Also completed by homemakers, students and unemployed.

Mostly sitting.....

Sitting or standing, occasionally walking.....

Walking, occasionally lifting.....

Heavy physical work.....

31. How would you describe your spare time? (tick one box only)  
 ☞ Include transportation to and from work/school.

Light physical activity less than 2 hours per week .....

Light physical activity 2-4 hours per week.....

Light physical activity more than 4 hours per week.....

Strenuous physical activity for 2-4 hours a week .....

Strenuous physical activity more than 4 hours per week or regular hard exercise.....

32. What is your weight right now? ..... lp:

33. What was your weight 5 years ago (about)?..... lp:

34. What is the most you have ever weighed?..... lp:      
 ☞ Except of pregnancy.

35. What is your waist circumference measured from your navel?..... in:

36. How tall are you (without shoes)?..... in:

**Thank you very much for your help**

**Please return the completed questionnaire to the staff**

+

Til tappenummer

+

**DET DANSKE BLODDONORSTUDIE**

Vi vil bede dig besvare nogle spørgsmål, der først og fremmest drejer sig om dit helbred og livsstil. Hvis der er spørgsmål du ikke kan svare på, kan du springe dem over.

Spørgsmålene i skemaet kan besvares ved, at du sætter kryds i en rubrik eller ved at skrive tal. Da svarene bliver indlæst maskinelt vil vi bede dig udfylde skemaet med blå eller sort kuglepen. Brug ikke blyant. Tal skal være nemme at tolke, hvilket er vist i nedenstående eksempel:

0 1 2 3 4 5 6 7 8 9

Har du skrevet et forkert tal i et felt, skal du rette det på følgende måde: ~~19~~

Hvis du kommer til at sætte kryds i en forkert rubrik, skal du overstrege det forkerte kryds til rubrikken er helt fyldt ud. Herefter kan du sætte kryds i den rigtige rubrik.

Hvis du har spørgsmål til undersøgelsen, kan du spørge personalet på tappestedet.

Skemaet bedes afleveret til blodbankens personale, når du er færdig med at udfylde det.

**På forhånd tak for hjælpen!**

**De følgende spørgsmål handler om din opfattelse af dit helbred**

1. Hvordan synes du dit helbred er alt i alt? (Sæt kun et kryds)

|                          |                          |                          |                                     |                          |
|--------------------------|--------------------------|--------------------------|-------------------------------------|--------------------------|
| Fremragende              | Vældig godt              | Godt                     | Mindre godt                         | Dårligt                  |
| <input type="checkbox"/> | <input type="checkbox"/> | <input type="checkbox"/> | <input checked="" type="checkbox"/> | <input type="checkbox"/> |

2. De følgende spørgsmål handler om aktiviteter i dagligdagen. Er du på grund af dit helbred begrænset i disse aktiviteter? I så fald hvor meget?

|                                                                          | Ja, meget begrænset      | Ja, lidt begrænset       | Nej, slet ikke begrænset |
|--------------------------------------------------------------------------|--------------------------|--------------------------|--------------------------|
| Lettere aktiviteter, såsom at flytte et bord, støvsuge eller cykle ..... | <input type="checkbox"/> | <input type="checkbox"/> | <input type="checkbox"/> |
| At gå flere etager op ad trapper .....                                   | <input type="checkbox"/> | <input type="checkbox"/> | <input type="checkbox"/> |

3. Har du indenfor de sidste 4 uger haft nogen af følgende problemer med dit arbejde eller andre daglige aktiviteter på grund af dit fysiske helbred?

|                                                                                                      | Ja                       | Nej                      |
|------------------------------------------------------------------------------------------------------|--------------------------|--------------------------|
| Jeg har nået mindre, end jeg gerne ville .....                                                       | <input type="checkbox"/> | <input type="checkbox"/> |
| Jeg har været begrænset i hvilken slags arbejde eller andre aktiviteter, jeg har kunnet udføre ..... | <input type="checkbox"/> | <input type="checkbox"/> |

4. Har du inden for de sidste 4 uger haft nogen af følgende problemer med dit arbejde eller andre daglige aktiviteter på grund af følelsesmæssige problemer?

|                                                                                             | Ja                       | Nej                      |
|---------------------------------------------------------------------------------------------|--------------------------|--------------------------|
| Jeg har nået mindre, end jeg gerne ville .....                                              | <input type="checkbox"/> | <input type="checkbox"/> |
| Jeg har udført mit arbejde eller andre aktiviteter mindre omhyggeligt, end jeg plejer ..... | <input type="checkbox"/> | <input type="checkbox"/> |

5. Inden for de sidste 4 uger hvor meget har fysisk smerte vanskeliggjort dit daglige arbejde (både arbejde udenfor hjemmet og husarbejde)? (Sæt kun et kryds)

|                          |                          |                          |                          |                          |
|--------------------------|--------------------------|--------------------------|--------------------------|--------------------------|
| Slet ikke                | Lidt                     | Noget                    | En hel del               | Virkeligt meget          |
| <input type="checkbox"/> | <input type="checkbox"/> | <input type="checkbox"/> | <input type="checkbox"/> | <input type="checkbox"/> |

+

+

6. Disse spørgsmål handler om, hvordan du har haft det i de sidste 4 uger. Hvor stor en del af tiden de sidste 4 uger...

|                                           | Hele tiden               | Det meste af tiden       | En hel del af tiden      | Noget af tiden           | Lidt af tiden            | På intet tidspunkt       |
|-------------------------------------------|--------------------------|--------------------------|--------------------------|--------------------------|--------------------------|--------------------------|
| ... har du følt dig rolig og afslappet?   | <input type="checkbox"/> | <input type="checkbox"/> | <input type="checkbox"/> | <input type="checkbox"/> | <input type="checkbox"/> | <input type="checkbox"/> |
| ... har du været fuld af energi? .....    | <input type="checkbox"/> | <input type="checkbox"/> | <input type="checkbox"/> | <input type="checkbox"/> | <input type="checkbox"/> | <input type="checkbox"/> |
| ... har du følt dig trist til mode? ..... | <input type="checkbox"/> | <input type="checkbox"/> | <input type="checkbox"/> | <input type="checkbox"/> | <input type="checkbox"/> | <input type="checkbox"/> |

7. Inden for de sidste 4 uger, hvor stor en del af tiden har dit fysiske helbred eller følelsesmæssige problemer gjort det vanskeligt at se andre mennesker (f.eks. besøge venner, slægtinge osv.)?

| Hele tiden               | Det meste af tiden       | Noget af tiden           | Lidt af tiden            | På intet tidspunkt       |
|--------------------------|--------------------------|--------------------------|--------------------------|--------------------------|
| <input type="checkbox"/> | <input type="checkbox"/> | <input type="checkbox"/> | <input type="checkbox"/> | <input type="checkbox"/> |

8. Hvordan synes du dit helbred er, sammenlignet med andre på din alder?.....

| Bedre                    | Det samme                | Dårligere                |
|--------------------------|--------------------------|--------------------------|
| <input type="checkbox"/> | <input type="checkbox"/> | <input type="checkbox"/> |

### **Det følgende spørgsmål handler om almindelige infektioner**

9. Har du nogen sinde fået at vide af en læge, at du har haft kysesyge (mononukleose)? .....

| Ja                       | Nej                      |
|--------------------------|--------------------------|
| <input type="checkbox"/> | <input type="checkbox"/> |

**Hvis ja:** Hvor gammel var du dengang?..... Alder:   år

### **Følgende spørgsmål handler om vitamintilskud, jerntilskud, kost og alkohol**

10. Har du taget multivitaminpiller indenfor de se sidste 4 uger?

|                                                        |                          |
|--------------------------------------------------------|--------------------------|
| Ja, dagligt .....                                      | <input type="checkbox"/> |
| Ja, 4-6 gange pr. uge .....                            | <input type="checkbox"/> |
| Ja, 1-3 gange pr. uge .....                            | <input type="checkbox"/> |
| Ja, mindre end 3 gange indenfor de sidste 4 uger ..... | <input type="checkbox"/> |
| Nej, aldrig .....                                      | <input type="checkbox"/> |

11. Har du taget jerntabletter indenfor de sidste 4 uger?

|                                                        |                          |
|--------------------------------------------------------|--------------------------|
| Ja, dagligt .....                                      | <input type="checkbox"/> |
| Ja, 4-6 gange pr. uge .....                            | <input type="checkbox"/> |
| Ja, 1-3 gange pr. uge .....                            | <input type="checkbox"/> |
| Ja, mindre end 3 gange indenfor de sidste 4 uger ..... | <input type="checkbox"/> |
| Nej, aldrig .....                                      | <input type="checkbox"/> |

12. Fik du udleveret jerntabletter sidste gang du gav blod? .....

| Ja                       | Nej                      |
|--------------------------|--------------------------|
| <input type="checkbox"/> | <input type="checkbox"/> |

**Hvis ja:** Hvor mange jerntabletter tog du?..... Antal:

13. Hvor mange gange om ugen spiser du kød? .....

Antal gange:

14. Hvor mange gange om ugen spiser du fisk? .....

Antal gange:

15. Hvor mange æg spiser du om ugen? .....

Antal æg:

16. Hvor ofte drikker du ...

|                 | Aldrig / næsten aldrig   | Nogle gange om måneden   | Nogle gange om ugen      | Dagligt / næsten dagligt | Antal i gennemsnit pr. uge      |
|-----------------|--------------------------|--------------------------|--------------------------|--------------------------|---------------------------------|
| mælk? .....     | <input type="checkbox"/> | <input type="checkbox"/> | <input type="checkbox"/> | <input type="checkbox"/> | Glas: <input type="text"/>      |
| kaffe? .....    | <input type="checkbox"/> | <input type="checkbox"/> | <input type="checkbox"/> | <input type="checkbox"/> | Kopper: <input type="text"/>    |
| te? .....       | <input type="checkbox"/> | <input type="checkbox"/> | <input type="checkbox"/> | <input type="checkbox"/> | Kopper: <input type="text"/>    |
| øl? .....       | <input type="checkbox"/> | <input type="checkbox"/> | <input type="checkbox"/> | <input type="checkbox"/> | Flasker: <input type="text"/>   |
| vin? .....      | <input type="checkbox"/> | <input type="checkbox"/> | <input type="checkbox"/> | <input type="checkbox"/> | Glas: <input type="text"/>      |
| spiritus? ..... | <input type="checkbox"/> | <input type="checkbox"/> | <input type="checkbox"/> | <input type="checkbox"/> | Genstande: <input type="text"/> |

### De følgende spørgsmål handler om rygning

17. Ryger du nu?

- Ja, mere end 1 cigaret / cerut / pibestop om dagen .....  **Gå til sp. 20**  
 Ja, men mindre end 1 cigaret / cerut / pibestop om dagen .....  **Gå til sp. 20**  
 Nej .....

18. Har du røget tidligere?

- Ja, mere end 1 cigaret / cerut / pibestop om dagen .....   
 Ja, men mindre end 1 cigaret / cerut / pibestop om dagen .....   
 Nej .....  **Gå til sp. 23**

19. Hvornår holdt du op med at ryge? ..... Årstal:

20. Hvor mange år har du røget regelmæssigt? ..... Antal hele år:

21. Hvor meget ryger du (eller røg) du i gennemsnit om dagen?

- Antal cigaretter .....   
 Antal cerutter eller cigarer .....   
 Antal pibestop .....

22. Bruger du nikotinsubstitut (tyggegummi, plaster eller lignende)? .....  Ja  Nej

**Hvis ja:** Hvor længe har du brugt det? ..... Antal hele år:

23. Hvor mange timer pr dag bliver du udsat for passiv rygning? ..... Timer:

24. Blev der røget i dit barndomshjem? .....  Ja  Nej

### Kun for kvinder – mænd bedes gå til spørgsmål 30

25. Hvor gammel var du, da dine menstruationer begyndte? ..... Alder:  år

26. Er dine menstruationer holdt op? .....  Ja  Nej

**Hvis nej:** Hvor mange dage varer dine menstruationer vanligvis? Antal dage:

**Hvis ja:** Ophørte de pga. medicin eller anden behandling?  Ja  Nej

Hvor gammel var du, da dine menstruationer holdt op? ..... Alder:  år

- |     |                         |                          |                          |
|-----|-------------------------|--------------------------|--------------------------|
|     |                         | Ja                       | Nej                      |
| 27. | Har du født børn? ..... | <input type="checkbox"/> | <input type="checkbox"/> |
| 28. | Har du ammet? .....     | <input type="checkbox"/> | <input type="checkbox"/> |

**Hvis ja:** Hvor længe har du sammenlagt ammet dine børn? Antal måneder:

- |                 |                                     |                          |                          |
|-----------------|-------------------------------------|--------------------------|--------------------------|
|                 |                                     | Ja                       | Nej                      |
| 29.             | Bruger du prævention? .....         | <input type="checkbox"/> | <input type="checkbox"/> |
| <b>Hvis ja:</b> | marker den prævention du bruger for |                          |                          |
|                 | P-piller .....                      | <input type="checkbox"/> |                          |
|                 | Mini-piller .....                   | <input type="checkbox"/> |                          |
|                 | Almindelig spiral ...               | <input type="checkbox"/> |                          |
|                 | Hormonspiral .....                  | <input type="checkbox"/> |                          |
|                 | P-stav .....                        | <input type="checkbox"/> |                          |
|                 | P-ring eller p-plaster              | <input type="checkbox"/> |                          |
|                 | Anden prævention                    | <input type="checkbox"/> |                          |

### **De følgende spørgsmål handler om motion, vægt og højde**

30. Hvordan vil du beskrive dit arbejde eller din daglige beskæftigelse? (sæt kun et kryds)

☞ Udfyldes også af hjemmegående, studerende og arbejdsløse.

- |                                                |                          |
|------------------------------------------------|--------------------------|
| Overvejende siddende .....                     | <input type="checkbox"/> |
| Siddende eller stående, af og til gående ..... | <input type="checkbox"/> |
| Gående, af og til løft .....                   | <input type="checkbox"/> |
| Tungt fysisk arbejde .....                     | <input type="checkbox"/> |

31. Hvordan vil du beskrive din fritid? (sæt kun et kryds)

☞ Medregn også transport til og fra arbejde/skole.

- |                                                                                               |                          |
|-----------------------------------------------------------------------------------------------|--------------------------|
| Let fysisk aktivitet mindre end 2 timer om ugen .....                                         | <input type="checkbox"/> |
| Let fysisk aktivitet i 2-4 timer om ugen .....                                                | <input type="checkbox"/> |
| Let fysisk aktivitet mere end 4 timer om ugen .....                                           | <input type="checkbox"/> |
| Anstrengende fysisk aktivitet i 2-4 timer om ugen .....                                       | <input type="checkbox"/> |
| Anstrengende fysisk aktivitet i mere end 4 timer om ugen eller regelmæssig hård træning ..... | <input type="checkbox"/> |

32. Hvad vejer du nu? ..... kg:

33. Hvad vejede du for 5 år siden (cirka)? ..... kg:

34. Hvad er det meste du nogensinde har vejet? ..... kg:     
☞ Bortset fra under graviditet.

35. Hvad er dit taljemål eller livvidde målt ud for navlen? ..... cm:

36. Hvor høj er du (uden sko)? ..... cm:

**Mange tak for din hjælp**

**Sørgeskemaet bedes afleveret på tappestedet**
