# Supplementary material for: Low-grade inflammation is negatively associated with physical Health-Related Quality of Life in healthy individuals: Results from The Danish Blood Donor Study (DBDS)
Source: PubMed Central journal article supplement (PMC6438577; doi:10.1371/journal.pone.0214468), 2019-03-28
Supplement: pone.0214468.s002.pdf [file pone.0214468.s002.pdf]

## S2 Supporting Information File

### PLOS ONE

Low-grade inflammation is negatively associated with physical Health Related Quality of Life in healthy individuals: results from The Danish Blood Donor Study (DBDS)

**S2 Table A. Missing group (n=2,515)**

|                                                         | <b>Women</b>      | <b>Men</b>         | <b>No. of missing response*</b> |
|---------------------------------------------------------|-------------------|--------------------|---------------------------------|
| <b>Numbers of participants</b>                          | 1,413 (56.2)      | 1,102 (43.8)       |                                 |
| <b>Age, years</b>                                       | 37.9 (26.5; 48.4) | 39.2 (30.1; 50.6)  |                                 |
| <b>BMI, kg/m<sup>2</sup></b>                            | 24.4 (21.9; 28.2) | 25.2 (23.4; 27.8)  | 1,017                           |
| <b>Obesity, BMI<math>\geq</math>30 kg/m<sup>2</sup></b> | 155 (19.2)        | 115 (15.0)         | 1,017                           |
| <b>Current smoker</b>                                   | 166 (22.0)        | 133 (18.1)         | 1,024                           |
| <b>Waist circumference (cm)</b>                         | 85.0 (78.0; 92.0) | 94.0 (88.0; 100.0) | 1,985                           |
| <b>PCS (point)</b>                                      | 54.5 (51.4; 56.2) | 55.0 (54.1; 56.2)  | 0                               |
| <b>MCS (point)</b>                                      | 51.8 (47.4; 54.8) | 54.0 (52.0; 56.7)  | 0                               |
| <b>CRP, mg/L</b>                                        | 0.86 (0.27; 2.35) | 0.50 (0.15; 1.26)  | 0                               |
| <b>Low-grade inflammation (LGI)*</b>                    | 252 (17.8)        | 81 (7.35)          | 0                               |
| <b>CRP &gt; 5 mg/L</b>                                  | 100 (7.1)         | 33 (3.0)           | 0                               |
| <b>Combined oral contraception</b>                      | 243(17.2)         | -                  |                                 |

**S2 Table B. Excluded participants with C-reactive protein levels above 10 mg/L (n=176).**

|                                                         | <b>Women</b>       | <b>Men</b>         |
|---------------------------------------------------------|--------------------|--------------------|
| <b>Numbers of participants</b>                          | 135 (76.7)         | 41 (23.3)          |
| <b>Age, years</b>                                       | 31.6 (25.5; 42.5)  | 43.1 (32.6; 53.9)  |
| <b>Body mass index (BMI), kg/m<sup>2</sup></b>          | 28.3 (25.3; 33.1)  | 26.9 (24.2; 30.2)  |
| <b>Obesity, BMI<math>\geq</math>30 kg/m<sup>2</sup></b> | 52 (38.5)          | 11 (26.8)          |
| <b>Current smoker</b>                                   | 37 (27.4)          | 9 (22.0)           |
| <b>Waist circumference (cm)</b>                         | 91.5 (82.0; 102.0) | 97.0 (89.0; 105.0) |
| <b>Physical Component Score, PCS (point)</b>            | 55.5 (53.2;56.8)   | 54.7 (51.2; 56.6)  |
| <b>Mental Component Score, MCS (point)</b>              | 53.2 (49.0; 56.7)  | 54.8 (49.9; 56.7)  |
| <b>C-reactive protein, CRP (mg/L)</b>                   | 12.1 (11.0; 13.4)  | 11.5 (10.6; 12.9)  |
| <b>Combined oral contraception</b>                      | 83 (61.5)          | -                  |

**S2 Table C. Sensitivity analysis, predictors of PCS and MCS estimated by multivariable linear regression analysis of case-complete participants with C-reactive protein level > 10 mg/L included (n=14,547).**

|                                       | Women using OC<br>(n=2,064) |                 | Women not using OC<br>(n=4,824) |                 | Men (n=7,659) |                 | Men and women not using OC<br>(n=12,483) |                 |
|---------------------------------------|-----------------------------|-----------------|---------------------------------|-----------------|---------------|-----------------|------------------------------------------|-----------------|
| <b>Outcome PCS</b>                    | <b>RC</b>                   | <b>(95% CI)</b> | <b>RC</b>                       | <b>(95% CI)</b> | <b>RC</b>     | <b>(95% CI)</b> | <b>RC</b>                                | <b>(95% CI)</b> |
| Low-grade inflammation (LGI)          | -0.38                       | (-0.74; -0.04)  | -0.68                           | (-1.10; -0.26)  | -0.79         | (-1.13; -0.45)  | -0.78                                    | (-1.17; -0.39)  |
| BMI (kg/m <sup>2</sup> )              | -0.11                       | (-0.16; -0.05)  | -1.13                           | (-0.16; -0.09)  | -0.14         | (-0.17; -0.10)  | -1.20                                    | (-1.43; -0.98)  |
| Current smoker (yes/no)               | -0.69                       | (-1.11; -0.26)  | -0.69                           | (-0.97; -0.40)  | -0.58         | (-0.81; -0.36)  | -0.61                                    | (-0.79; -0.44)  |
| Age (10 year increment)               | 0.13                        | (-0.09; 0.35)   | -0.27                           | (-0.36; -0.18)  | -0.16         | (-0.23; -0.09)  | -0.22                                    | (-0.28; -0.17)  |
| Waist (10 cm increment)               | -0.40                       | (-0.76; -0.05)  | -0.24                           | (-0.51; -0.03)  | -0.47         | (-0.67; -0.27)  | -0.70                                    | (-0.84; -0.56)  |
| Physical activity, work (low/high)    | -0.12                       | (-0.50; 0.26)   | -0.43                           | (-0.70; -0.17)  | -0.50         | (-0.69; -0.32)  | -0.49                                    | (-0.65; -0.34)  |
| Physical activity, leisure (low/high) | 0.50                        | (0.17; 0.84)    | 0.75                            | (0.52; 0.99)    | 0.70          | (0.52; 0.88)    | 0.73                                     | (0.59; 0.87)    |
| Female                                |                             |                 |                                 |                 |               |                 | -0.18                                    | (-0.32; -0.04)  |
| Female x LGI                          |                             |                 |                                 |                 |               |                 | -0.02                                    | (-0.54; 0.49)   |
| <b>Outcome MCS</b>                    | <b>RC</b>                   | <b>(95% CI)</b> | <b>RC</b>                       | <b>(95% CI)</b> | <b>RC</b>     | <b>(95% CI)</b> | <b>RC</b>                                | <b>(95% CI)</b> |
| Low-grade inflammation (LGI)          | 0.24                        | (-0.40; 0.89)   | -0.10                           | (-0.77; 0.58)   | 0.03          | (-0.50; 0.57)   | 0.07                                     | (-0.55; 0.68)   |
| BMI (kg/m <sup>2</sup> )              | -0.06                       | (-0.16; 0.04)   | 0.04                            | (-0.01; 0.10)   | -0.02         | (-0.07; 0.03)   | 0.16                                     | (-0.20; 0.52)   |
| Current smoker (yes/no)               | -1.06                       | (-1.84; -0.27)  | -0.89                           | (-1.35; -0.44)  | -0.82         | (-1.16; -0.47)  | -0.85                                    | (-1.13; -0.57)  |
| Age (10 year increment)               | 1.15                        | (0.74; 1.56)    | 1.25                            | (1.10; 1.40)    | 1.00          | (0.90; 1.11)    | 1.10                                     | (1.01; 1.18)    |
| Waist (10 cm increment)               | -0.34                       | (-0.99; 0.32)   | -0.39                           | (-0.84; 0.04)   | -0.18         | (-0.21; 0.15)   | -0.27                                    | (-0.50; -0.04)  |
| Physical activity, work (low/high)    | -0.09                       | (-0.80; 0.61)   | 0.47                            | (0.05; 0.90)    | 0.64          | (0.34; 0.93)    | 0.56                                     | (0.32; 0.80)    |
| Physical activity, leisure (low/high) | 1.02                        | (0.39; 1.64)    | 1.04                            | (0.67; 1.41)    | 1.15          | (0.87; 1.42)    | 1.10                                     | (0.88; 1.32)    |
| Female                                |                             |                 |                                 |                 |               |                 | 1.01                                     | (0.79; 1.24)    |
| Female x LGI                          |                             |                 |                                 |                 |               |                 | -0.12                                    | (-0.94; 0.69)   |

**S2 Table D. Diet and childbirth as predictors of PCS and MCS estimated by univariate linear regression analysis of case-complete participants (n=15,380)**

|                              | Women using OC<br>(n=2,143) |               | Women not using OC<br>(n=5,106) |               | Men (n=8,131) |               |
|------------------------------|-----------------------------|---------------|---------------------------------|---------------|---------------|---------------|
|                              | RC                          | (95% CI)      | RC                              | (95% CI)      | RC            | (95% CI)      |
| <b>Outcome: PCS</b>          |                             |               |                                 |               |               |               |
| Meat consumption (yes/no) *  | -0.02                       | (-1.26; 1.31) | -0.84                           | (-1.74; 0.46) | -1.05         | (-2.30; 0.20) |
| Fish consumption (yes/no) ** | 0.34                        | (-0.04; 0.66) | 0.16                            | (-0.06; 0.39) | 0.30          | (-0.13; 0.47) |
| Childbirth (yes/no)          | -0.31                       | (-0.68; 0.05) | -0.35                           | (-0.60; 0.12) | -             | -             |
|                              |                             |               |                                 |               |               |               |
| <b>Outcome: MCS</b>          |                             |               |                                 |               |               |               |
| Meat consumption (yes/no)    | 2.07                        | (-0.30; 4.44) | 2.27                            | (-0.83; 3.70) | 1.76          | (-0.19; 3.70) |
| Fish consumption (yes/no)    | 0.66                        | (-0.10; 1.23) | 0.01                            | (-0.35; 0.36) | 0.08          | (-0.18; 0.34) |
| Childbirth (yes/no)          | 0.89                        | (-0.21; 1.56) | 1.47                            | (0.01; 1.85)  | -             | -             |

**S2 Table E. Predictors of PCS and MCS estimated by multivariable linear regression analysis after transformation of data by power of four (MCS) and five(PCS)**

|                                       | Women using OC (n=1,984) |          | Women not using OC (n=4,770) |          | Men (n=7,617) |          |
|---------------------------------------|--------------------------|----------|------------------------------|----------|---------------|----------|
| <b>Outcome PCS</b>                    | <b>RC</b>                | <b>P</b> | <b>RC</b>                    | <b>P</b> | <b>RC</b>     | <b>P</b> |
| Low-grade inflammation (LGI)          | ↓                        | 0.001    | ↓                            | <0.001   | ↓             | <0.001   |
| BMI (kg/m <sup>2</sup> )              | ↓                        | 0.004    | ↓                            | <0.001   | ↓             | <0.001   |
| Current smoker (yes/no)               | ↓                        | 0.031    | ↓                            | <0.001   | ↓             | <0.001   |
| Age (10 year increment)               | ↑                        | 0.39     | ↓                            | <0.001   | ↓             | <0.001   |
| Waist (10 cm increment)               | ↓                        | <0.001   | ↓                            | <0.001   | ↓             | <0.001   |
| Physical activity, work (low/high)    | ↓                        | 0.59     | ↓                            | 0.017    | ↓             | <0.001   |
| Physical activity, leisure (low/high) | ↑                        | 0.002    | ↑                            | <0.001   | ↑             | <0.001   |
| <b>Outcome MCS</b>                    | <b>RC</b>                | <b>P</b> | <b>RC</b>                    | <b>P</b> | <b>RC</b>     | <b>P</b> |
| Low-grade inflammation (LGI)          | ↑                        | 0.28     | ↓                            | 0.72     | ↑             | 0.35     |
| BMI (kg/m <sup>2</sup> )              | ↓                        | 0.30     | ↑                            | 0.056    | ↓             | 0.63     |
| Current smoker (yes/no)               | ↓                        | 0.018    | ↓                            | 0.016    | ↓             | <0.001   |
| Age (10 year increment)               | ↑                        | <0.001   | ↑                            | <0.001   | ↑             | <0.001   |
| Waist (10 cm increment)               | ↓                        | 0.082    | ↓                            | 0.087    | ↓             | 0.12     |
| Physical activity, work (low/high)    | ↑                        | 0.39     | ↑                            | 0.071    | ↑             | <0.001   |
| Physical activity, leisure (low/high) | ↑                        | 0.003    | ↑                            | <0.001   | ↑             | <0.001   |
